# Supplementary material
Source: Springer Nature journal article supplement (https://www.springermedizin.de/resource/supplementary/13058_2010_2524_MOESM8_ESM.pdf/9701606)

(a)

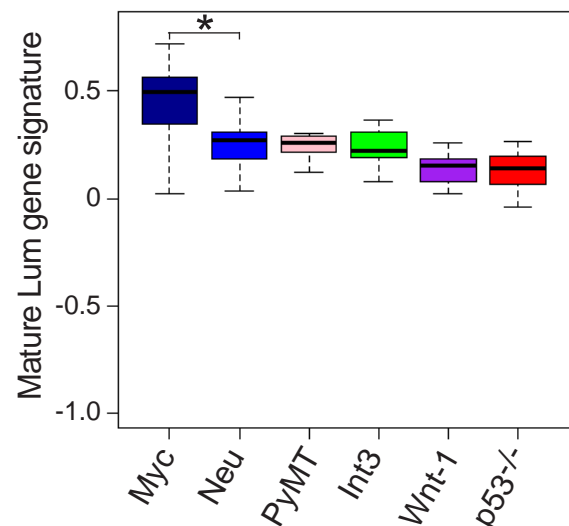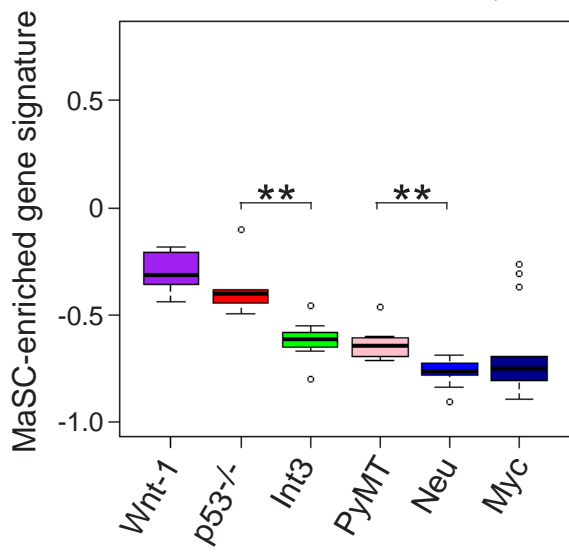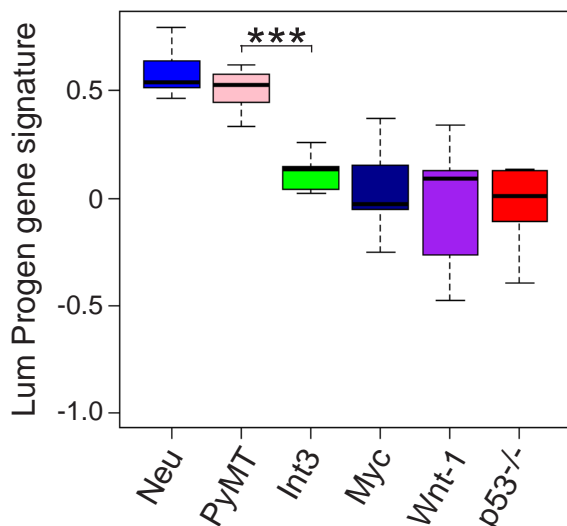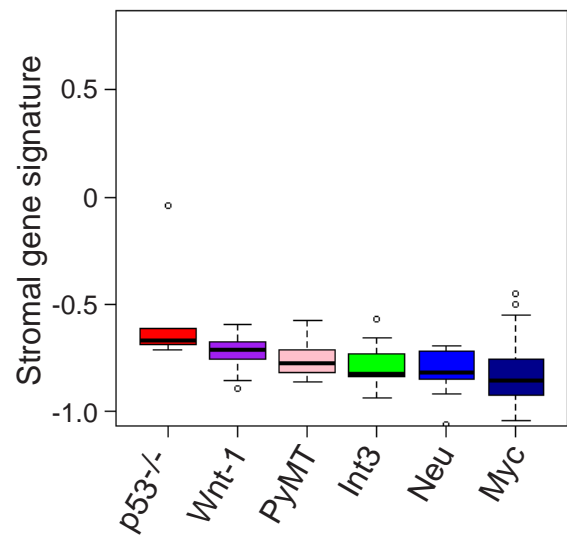

(b)

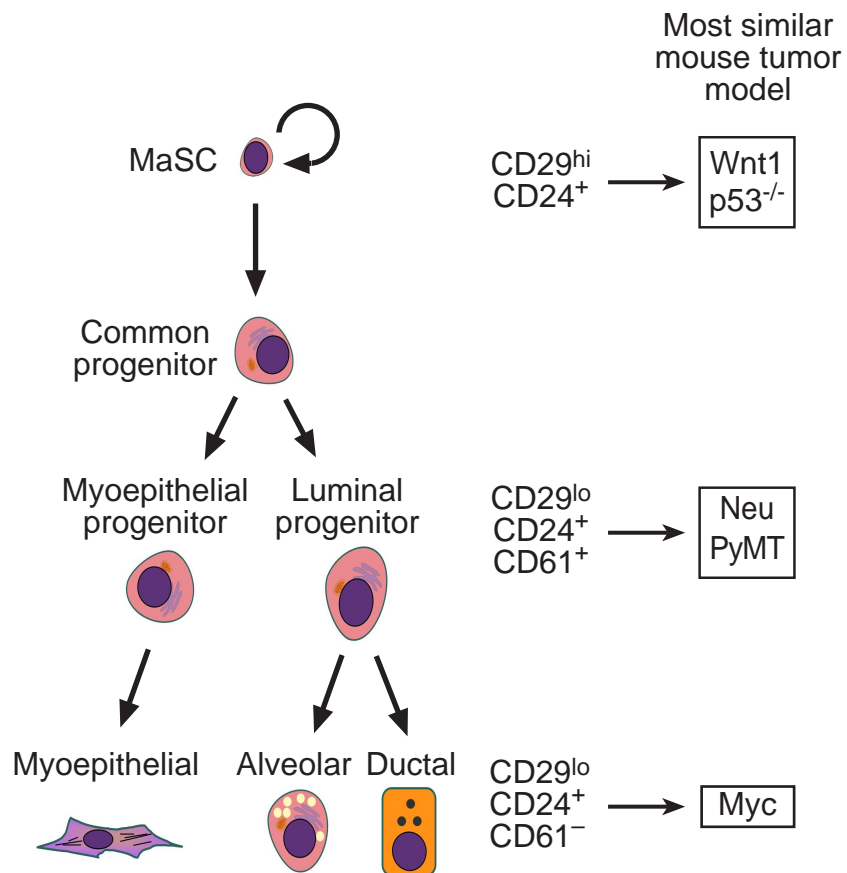

Supplement: MOESM8 [file 9701606]
